# Supplementary material for: Loss of maternal EED results in postnatal overgrowth
Source: PubMed Central journal article supplement (PMC6045828; doi:10.1186/s13148-018-0526-8), 2018-07-13
Supplement: 13148_2018_526_MOESM1_ESM.pdf [file 13148_2018_526_MOESM1_ESM.pdf]

## Supplementary information:

### Loss of maternal EED results in postnatal overgrowth

Lexie Prokopuk<sup>1</sup>, Jessica M. Stringer<sup>1,2</sup>, Craig R. White<sup>3</sup>, Rolf H.A.M Vossen<sup>4</sup>, Stefan J. White<sup>4</sup>, Ana S.A. Cohen<sup>5</sup>, William T. Gibson<sup>5</sup> and Patrick S. Western<sup>1#</sup>

<sup>1</sup>Centre for Genetic Diseases and Centre Reproductive Health, Hudson Institute of Medical Research and Department of Molecular and Translational Science, Monash University, Clayton, Victoria, Australia 3168.

<sup>2</sup>Monash Biomedicine Discovery Institute, Monash University, Clayton, Victoria, Australia 3800.

<sup>3</sup>Centre for Geometric Biology, School of Biological Sciences, Monash University, Clayton, Victoria, Australia 3800.

<sup>4</sup>Leiden Genome Technology Centre, Department of Human Genetics, Leiden University Medical Center, Leiden, the Netherlands

<sup>5</sup>Dept. of Medical Genetics, University of British Columbia and British Columbia Children's Hospital Research Institute, Vancouver, BC, Canada

#Corresponding author

[patrick.western@hudson.org.au](mailto:patrick.western@hudson.org.au)

Tel: +61 3 8572 2673

Supp Fig 1.

*Eed* Zp3-Cre deletion efficiency

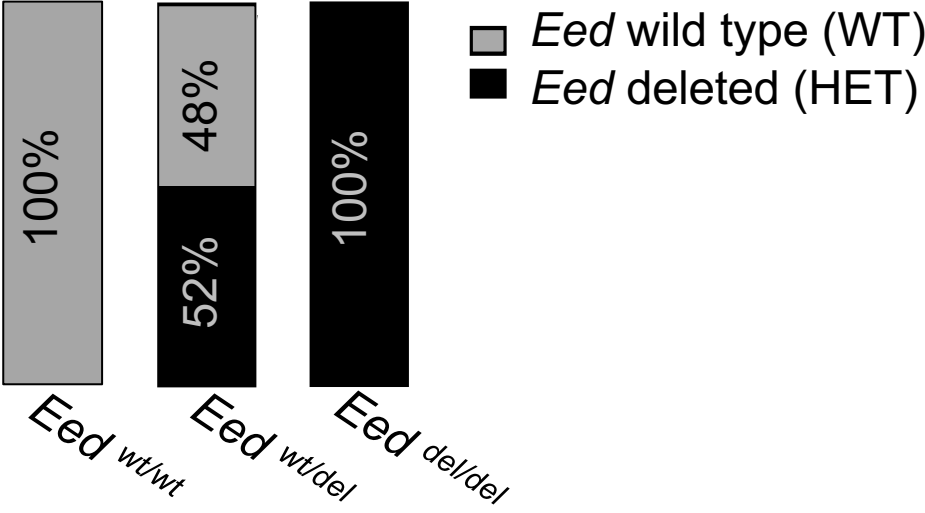

**Supp Fig 1. Deletion efficiency of *Eed;Zp3-Cre* transgene:** Genotyped offspring from *Eed* floxed females (*Eed*<sup>fl/fl</sup>, *Eed*<sup>wt/fl</sup>;*Zp3-Cre* and *Eed*<sup>fl/fl</sup>;*Zp3-Cre*) mated to wild type males. Grey bars represent genotyped WT offspring from *Eed*<sup>wt/wt</sup> or *Eed*<sup>wt/del</sup> growing oocytes; black bars represent genotyped HET offspring from *Eed*<sup>wt/del</sup> or *Eed*<sup>del/del</sup> growing oocytes (*Eed*<sup>fl/fl</sup> n= 54, *Eed*<sup>wt/fl</sup>;*Zp3-Cre* n=134 (wt=64, del=70) , *Eed*<sup>fl/fl</sup>;*Zp3-Cre* n=33; *Chi-square test*, *nsd*).

Supp Fig 2.

Female offspring

Male offspring

A.

PND2

PND2

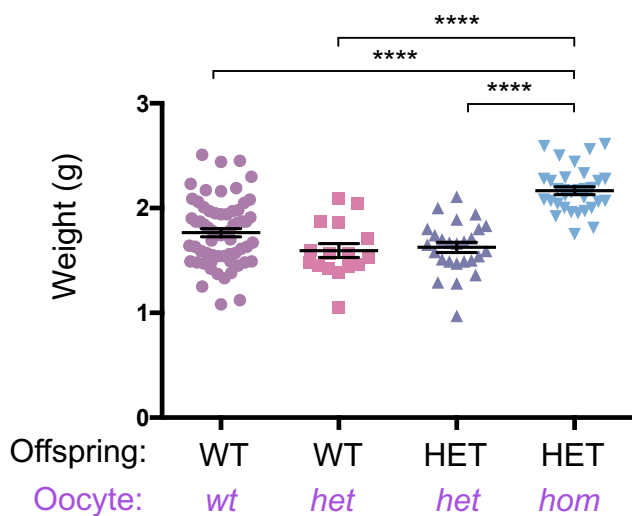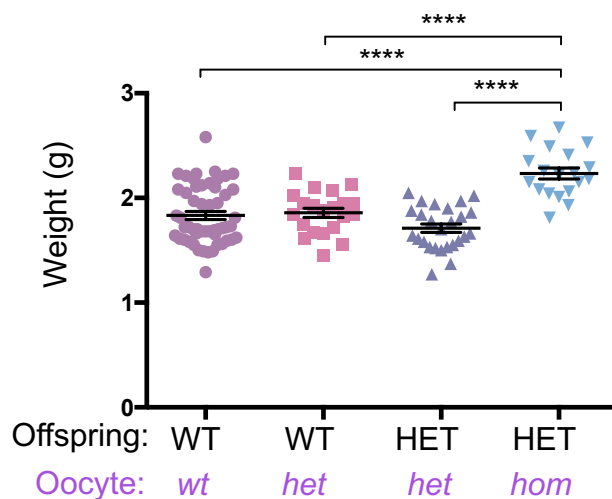

B.

PND30

PND30

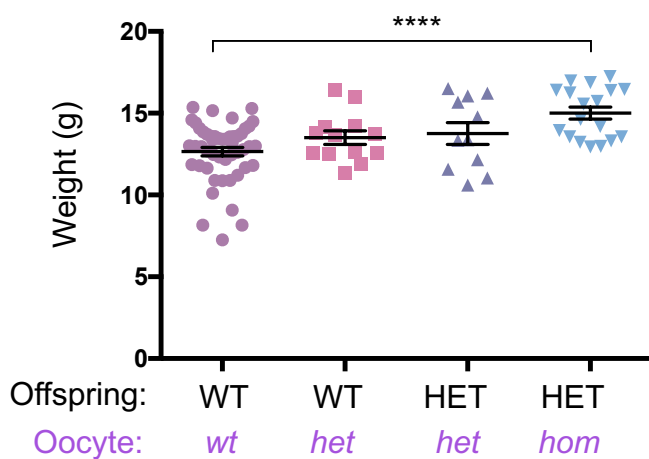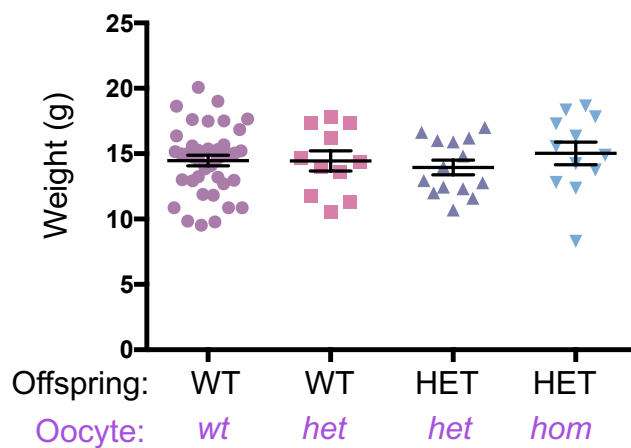

C.

PND130

PND130

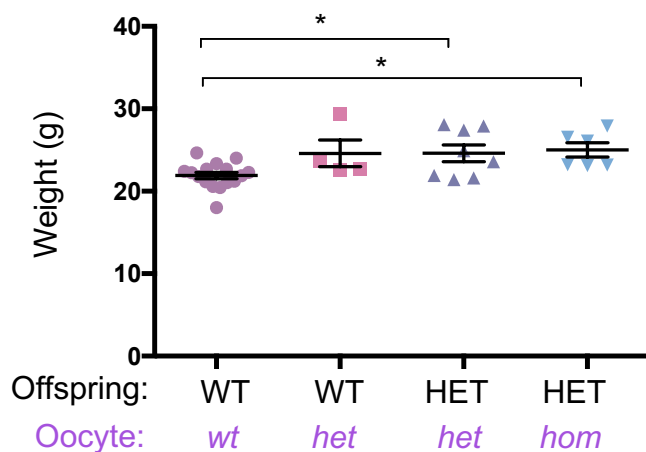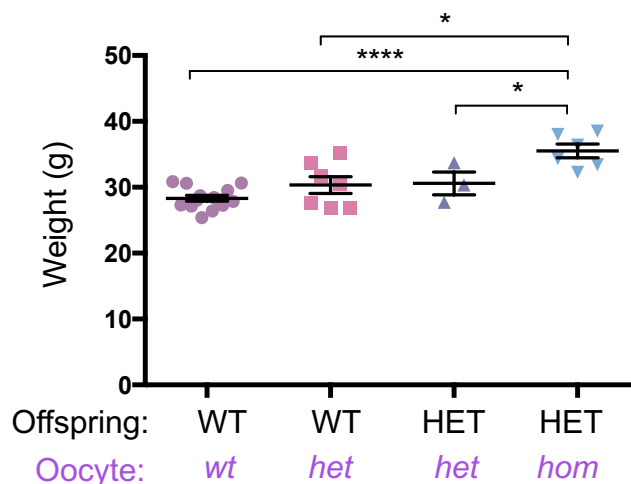

**Supp Fig 2. Increased weight of offspring from  $Eed^{del/del}$  oocytes showed no sex-bias and was ameliorated over time:** Weights of offspring at 2, 30 and 130 days old. Female (left graph) and male (right graph) offspring from wild type fathers mated to  $Eed^{fl/fl}$ ,  $Eed^{fl/del};Zp3-Cre$  and  $Eed^{fl/del};Zp3-Cre$  mothers. Growing oocyte genotype represented in purple:  $Eed^{wt/wt}$  (wild type, wt),  $Eed^{wt/del}$  (wt or heterozygous, het) and  $Eed^{del/del}$  (homozygous, hom). Offspring genotype represented in black:  $Eed$  WT offspring from  $Eed^{wt/wt}$  growing oocytes;  $Eed$  WT offspring from  $Eed^{wt/del}$  growing oocytes;  $Eed$  HET offspring from  $Eed^{wt/del}$  growing oocytes and  $Eed$  HET offspring from  $Eed^{del/del}$  growing oocytes. **A.** Female PND2 offspring:  $Eed^{wt/wt}$  n= 63,  $Eed^{wt/del}$  n=68,  $Eed^{del/del}$  n=32; Male PND2 offspring:  $Eed^{wt/wt}$  n= 53,  $Eed^{wt/del}$  n=74,  $Eed^{del/del}$  n=19. **B.** Female PND30 offspring:  $Eed^{wt/wt}$  n= 49,  $Eed^{wt/del}$  n=24,  $Eed^{del/del}$  n=18; Male PND30 offspring:  $Eed^{wt/wt}$  n=40,  $Eed^{wt/del}$  n=25,  $Eed^{del/del}$  n=12. **C.** Female PND130 (18 week old) offspring:  $Eed^{wt/wt}$  n= 16,  $Eed^{wt/del}$  n=12,  $Eed^{del/del}$  n=6; Male PND130 (18 week old) offspring:  $Eed^{wt/wt}$  n=14,  $Eed^{wt/del}$  n=10,  $Eed^{del/del}$  n=6. \*\*\*\*P<0.0001, One-way ANOVA plus post-hoc Tukey's multiple comparisons test. Error bars +/- SEM.

Supp Fig 3.

*Ezh2* Zp3-Cre deletion efficiency

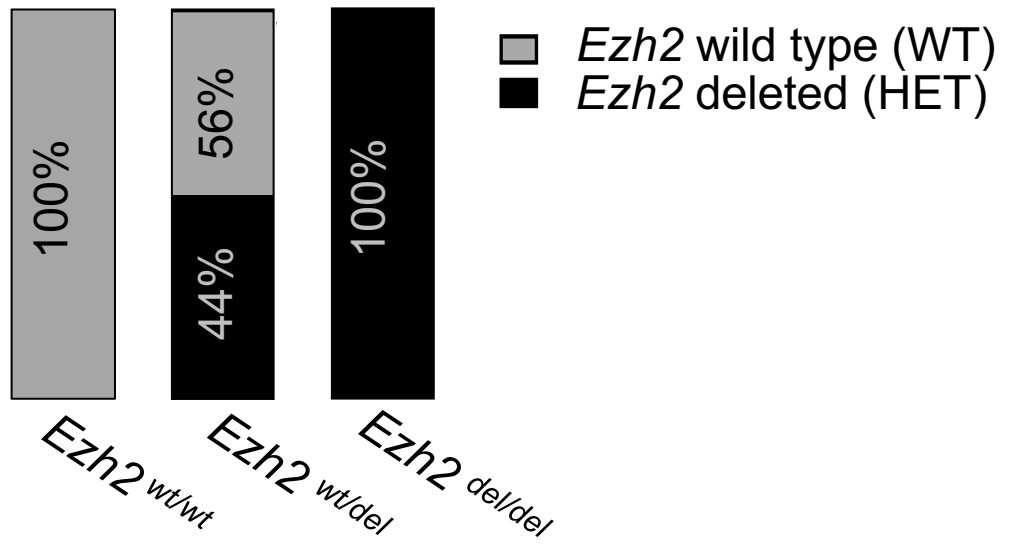

**Supp Fig 3. Deletion efficiency of *Ezh2*;*Zp3-Cre* transgene:** Genotyped offspring from *Eed* floxed females (*Ezh2*<sup>fl/fl</sup>, *Ezh2*<sup>wt/fl</sup>;*Zp3-Cre* and *Ezh2*<sup>fl/fl</sup>;*Zp3-Cre*) mated to wild type males. Grey bars represent genotyped WT offspring from *Ezh2*<sup>wt/wt</sup> or *Ezh2*<sup>wt/del</sup> growing oocytes; black bars represent genotyped HET offspring from *Ezh2*<sup>wt/del</sup> or *Ezh2*<sup>del/del</sup> growing oocytes. (*Ezh2*<sup>fl/fl</sup> n=23, *Ezh2*<sup>wt/fl</sup>;*Zp3-Cre* n, wt=35 and del=28 and *Ezh2*<sup>fl/fl</sup>;*Zp3-Cre* n=19) *Chi-square test, nsd*).

## Supplementary methods:

### Primer sequences of long range sequencing of patient and parental DNA samples:

| Fragment | M13-F primer                            | M13-R primer                           |
|----------|-----------------------------------------|----------------------------------------|
| EZH2-1   | TGTAAAACGACGGCCAGTAGCGTGTTCTTACCTGTGGG  | CAGGAAACAGCTATGACCGGACCTTTCAGCGACTCCAA |
| EZH2-2   | TGTAAAACGACGGCCAGTTGCATAGCCTGTGCTGTAGG  | CAGGAAACAGCTATGACCGGCAAACACCACAAGCTAGG |
| EZH2-3   | TGTAAAACGACGGCCAGTGAGTTAACTCTATCAGCCAGG | CAGGAAACAGCTATGACCAGCAGATGTCAAGGGATTCC |
